# Supplementary material
Source: ML conference proceedings conference paper supplement (https://proceedings.neurips.cc/paper_files/paper/2020/hash/d34a281acc62c6bec66425f0ad6dd645-Abstract.html)
Supplement: Supplementary file [file d34a281acc62c6bec66425f0ad6dd645-Supplemental.zip]

## A Proof of Proposition 1

In this section we give a self-contained proof of Proposition 1, restated here for convenience:

**Proposition 1** *Given a sample/target distribution  $P = (A_1, B_1), \dots, (A_m, B_m)$ , the problem of evaluating the performance  $p$  of a semilinear estimation algorithm specified by vectors  $a_1, \dots, a_m \in \mathbb{R}^n$  is NP-hard to estimate to within a multiplicative factor of  $\frac{\pi}{2}$ . However, letting  $M = \frac{1}{m} \sum_{i=1}^m (a_i - b_i)^T (a_i - b_i)$ , the optimum of the convex (semidefinite) program*

$$\max_{V \text{ psd}, V_{(j,j)} \leq 1} \sum_{j,k=1}^n M_{(j,k)} V_{(j,k)}$$

*is in the interval  $[p, \frac{\pi}{2}p]$ , and can be found in polynomial time by standard semidefinite programming algorithms.*

The proof of this proposition leverages the connection to the positive semidefinite Grothendieck problem:

**Definition 6.** *The positive semidefinite Grothendieck problem, given an  $n \times n$  positive semidefinite matrix  $M$  is to evaluate:*

$$\max_{x_1, \dots, x_n \in \{-1, 1\}} x^T M x \quad (4)$$

*(Note that this problem is sometimes phrased as the optimization over a pair of vectors  $x, y$ , of the expression  $x^T M y$ , though for positive semidefinite  $M$ , an optimum will always be attained when  $x = y$ .)*

The positive semidefinite Grothendieck problem includes MAX-CUT as a special case, since, for an undirected graph  $G$ , its Laplacian  $L$  is positive semidefinite, and for any vector  $x \in \{-1, 1\}^n$  that labels its vertices, the value of  $x^T L x$  will equal the total degree of the graph plus the size of the cut induced by the labels of  $x$ . Thus, since MAX-CUT is NP-hard, evaluating the performance of a fixed estimator is also NP-hard. Further, Håstad showed that it is NP-hard to even approximate MAX-CUT to within a multiplicative factor of  $\frac{17}{16}$  [13]. For the more general case of the semidefinite Grothendieck problem considered here, Khot and Naor showed the unique-games hardness of approximating the optimum to within a factor of  $\frac{\pi}{2}$ ; this result was recently strengthened by Briët, Regev, and Saket to show it is in fact NP-hard to get an approximation ratio better than  $\frac{\pi}{2}$  [17, 3]. Thus, even for a fixed semilinear estimation algorithm, we cannot hope to approximate its performance—given by Equation 1—to within a factor of  $\frac{\pi}{2}$ .

Analogously to the Goemans-Williamson semidefinite relaxation of MAX-CUT, we consider the semidefinite relaxation of the semidefinite Grothendieck problem, replacing each scalar variable  $x_j$  with a vector  $v_j$  in the  $n$ -dimensional unit ball.

**Definition 7.** *Given an  $n \times n$  positive semidefinite matrix  $M$ , the semidefinite relaxation of the positive semidefinite Grothendieck problem is to evaluate:*

$$\max_{v_j \in \mathbb{R}^n: \|v_j\| \leq 1} \sum_{j,k=1}^n M_{(j,k)} (v_j^T v_k) \quad (5)$$

*or, equivalently, letting “psd” denote the property of a matrix being positive semidefinite,*

$$\max_{V \text{ psd}, V_{(j,j)} \leq 1} \sum_{j,k=1}^n M_{(j,k)} V_{(j,k)}$$

Crucially, the set of positive semidefinite matrices is convex, so thus the optimization problem of Definition 7 (in its second form) maximizes a linear function over a convex set, and thus can be computed in polynomial time.

Goemans and Williamson famously showed, via a randomized rounding scheme, that the gap between MAX-CUT and the result of the induced positive semidefinite relaxation is bounded by a factor of 1.14 [11]. For the more general setting here, of arbitrary positive semidefinite matrices instead of graph Laplacians, Nesterov showed a bound of  $\frac{\pi}{2}$  [20]. We include a self-contained derivation here, for the sake of completeness.

Since scaling a single vector  $v_j$  affects Equation 5 in a convex quadratic manner, there will always be an optimum of Equation 5 where  $\|v_j\| = 1$  for all  $j$ . We assume this, for simplicity, when describing the randomized rounding procedure below.

**Definition 8.** Given  $n$  unit vectors  $v_j \in \mathbb{R}^n$ , for  $j \in \{1, \dots, n\}$ , the Goemans-Williamson randomized rounding procedure chooses a random direction  $r$ , and for each vector  $v_j$  returns a scalar  $x_j = \text{sign}(r^T v_j)$ .

**Proposition 2.** Given an  $n \times n$  positive semidefinite matrix  $M$ , and  $n$  unit vectors  $v_1, \dots, v_n \in \mathbb{R}^n$ , the value of the relaxed Grothendieck problem,  $\sum_{j,k=1}^n M_{(j,k)}(v_j^T v_k)$  is at most  $\frac{\pi}{2}$  times the expected value of the original Grothendieck problem evaluated on scalars  $x_1, \dots, x_n \in [-1, 1]$  obtained from  $v_1, \dots, v_n$  by the Goemans-Williamson randomized rounding procedure,  $\mathbb{E}[\sum_{j,k=1}^n M_{(j,k)} x_j x_k]$ .

Thus for any objective value that can be achieved in the relaxed problem, with vectors  $v_1, \dots, v_n$ , the original problem can achieve an objective value at least a  $\frac{2}{\pi}$  fraction of it, since it does so in expectation over scalars  $x_1, \dots, x_n$  obtained by the randomized rounding procedure.

*Proof of Proposition 2.* As in the analysis of the Goemans-Williamson randomized rounding scheme for MAX-CUT, note that the expected value  $\mathbb{E}[x_j x_k] = \mathbb{E}_r[\text{sign}(r^T v_j) \text{sign}(r^T v_k)]$ , where  $r$  is a randomly chosen direction. Because of the rotational symmetry of the distribution of  $r$ , we may equivalently rotate  $v_j$  and  $v_k$  into the plane, from which we can see that, for  $r$  also projected into the plane,  $\text{sign}(r^T v_j) \text{sign}(r^T v_k)$  equals 1 when  $r$  is within  $\frac{\pi}{2}$  radians of *both*  $v_j, v_k$  or *neither* of them. For a randomly chosen  $r$  in the plane, this happens with probability  $1 - \frac{1}{\pi} \theta_{j,k}$ , where  $\theta_{j,k}$  is the angle between  $v_j, v_k$ , yielding that  $\mathbb{E}[x_j x_k] = 1 - \frac{2}{\pi} \theta_{j,k}$ .

As  $\theta_{j,k}$  may be computed as  $\arccos(v_j^T v_k)$ , we may express the expected objective value after randomized rounding as

$$\mathbb{E}[\sum_{j,k=1}^n M_{(j,k)} x_j x_k] = \sum_{j,k=1}^n M_{(j,k)} (1 - \frac{2}{\pi} \arccos(v_j^T v_k))$$

Recall our overall aim, to show that this value times  $\frac{\pi}{2}$  is greater than or equal to  $\sum_{j,k=1}^n M_{(j,k)}(v_j^T v_k)$ . Subtracting these two quantities means that we need to show that the following quantity is nonpositive:

$$\sum_{j,k=1}^n M_{(j,k)} (v_j^T v_k - \frac{\pi}{2} + \arccos(v_j^T v_k)) \quad (6)$$

The power series expansion of  $\arccos(y)$  starts  $\arccos(y) = \frac{\pi}{2} - y + \sum_{\ell \geq 3} c_\ell y^\ell$  where all the remaining coefficients  $c_\ell$  are nonpositive, and converges on the entire interval  $y \in [-1, 1]$ . Thus Equation 6 equals

$$\sum_{j,k=1}^n \left( M_{(j,k)} \sum_{\ell \geq 3} c_\ell (v_j^T v_k)^\ell \right) \quad (7)$$

Since the matrix with  $(j, k)$  entry  $v_j^T v_k$  is positive semidefinite for any vectors  $v_1, \dots, v_n$ , and since elementwise raising a positive semidefinite matrix to a positive integer power yields another positive semidefinite matrix, Equation 7 can be reexpressed as  $\sum_{\ell \geq 3} \sum_{j,k=1}^n M_{(j,k)} N_{(j,k)}^{(\ell)}$  for some *negative* semidefinite matrices  $N^{(\ell)}$ , which is thus clearly less than or equal to 0, as desired.  $\square$

Combining the lower bounds and upper bounds of this section immediately yields Proposition 1.

## B Proof of Theorem 3

For ease of exposition, we restate the Theorem 3:

**Theorem.** *Algorithm 1, given a description of the joint distribution of sample and target sets  $(A_1, b_1), \dots, (A_m, b_m)$ , runs in polynomial time, and returns coefficients for a semilinear estimator whose expected squared error is within a  $\frac{\pi}{2}$  factor of that of the best semilinear estimator. The value of the objective function achieved by  $\hat{V}$  is  $m$  times the Proposition 1 SDP bound on the mean squared error of the best semilinear estimator.*

*Proof.* Proposition 1 describes a convex optimization problem to approximate to within a factor of  $\frac{\pi}{2}$  the performance of an estimator specified by vectors  $a_1, \dots, a_m \in \mathbb{R}^n$ . We thus consider optimizing Equation 2 over this choice (omitting the  $\frac{1}{m}$  factor for convenience):

$$\min_{a_i: \{j: a_i(j) \neq 0\} \subseteq A_i} \max_{V \text{ psd}, V_{(j,j)} \leq 1} \sum_{i=1}^m \sum_{j,k=1}^n (a_i - b_i)_{(j)} (a_i - b_i)_{(k)} V_{(j,k)} \quad (8)$$

By Proposition 1, this minimum (if we can efficiently find it), will be within a factor of  $\frac{\pi}{2}$  of the performance of the best semilinear estimator, and the vectors  $a_1, \dots, a_m$  that achieve this minimum will describe an estimator with this performance.

We proceed by invoking von Neumann's minimax theorem.

**Fact 2.** *Given a function  $f(x, y)$  that is convex as a function of its first argument and concave as a function of its second argument, and given convex domains  $X, Y$ , at least one of which is bounded, then*

$$\min_{x \in X} \max_{y \in Y} f(x, y) = \max_{y \in Y} \min_{x \in X} f(x, y)$$

The condition that "at least one of  $X, Y$  is bounded" is a relaxation of the original minimax theorem, shown sufficient by Sion [22].

We observe now that all the conditions of the minimax theorem are satisfied by the expression in Equation 8. As a function of  $a_i$ , the expression being optimized is the quadratic form with coefficients specified by the positive semidefinite matrix  $V$ ; thus the expression is a convex function of  $a_i$ , and since such functions are summed over all  $i \in \{1, \dots, m\}$ , the expression is a convex function of all the vectors  $a_1, \dots, a_m$ . Since the expression is *linear* in  $V$ , it is thus also concave as a function of  $V$ . Finally, the domains of the vectors  $a_1, \dots, a_m$ , along with the matrix  $V$  are both convex, and, since a positive semidefinite matrix must have each entry bounded by the size of the largest diagonal entry, the condition that  $V$  has diagonal entries bounded by 1 induces the same bound on the size of all entries of  $V$ .

Thus we invoke the minimax theorem to conclude that the value of Equation 8 is unchanged if we reverse the order of the min and the max:

$$\max_{V \text{ psd}, V_{(j,j)} \leq 1} \min_{a_i: \{j: a_i(j) \neq 0\} \subseteq A_i} \sum_{i=1}^m \sum_{j,k=1}^n (a_i - b_i)_{(j)} (a_i - b_i)_{(k)} V_{(j,k)} \quad (9)$$

Crucially, now, the inner minimization is simply a sum of positive semidefinite quadratic forms in each of the vectors  $a_1, \dots, a_m$ . Reexpressing the inner sum in vector notation as  $(a_i - b_i)^T V (a_i - b_i)$ , the gradient of this quadratic form with respect to  $a_i$  equals  $2V(a_i - b_i)$ . Thus, subject to the constraint that  $a_i$  can only be nonzero on coordinates in  $A_i$ , if there exists a vector  $a_i$  such that  $V(a_i - b_i) = 0$  on coordinates  $A_i$ , then this  $a_i$  attains the minimum; and otherwise the minimum is  $-\infty$ . The solution for  $a_i$ , restricted to the coordinates  $A_i$  is thus  $V_{(A_i, A_i)}^{-1} V_{(A_i)} b_i$  (or, when  $V_{(A_i, A_i)}$  is singular,  $V_{(A_i, A_i)}^+ V_{(A_i)} b_i$  is the least-squares solution). Plugging this  $a_i$  into the quadratic form yields  $b_i^T (V - V_{(A_i)}^T V_{(A_i, A_i)}^{-1} V_{(A_i)}) b_i$  for the inner minimization of the  $i^{\text{th}}$  term of the objective function. Finally, because of the setup of the minimax theorem, this expression must be a concave function of  $V$ , letting us conclude that Algorithm 1 can in fact conduct the optimization in polynomial time, as desired.

(As a side note, directly proving the above objective function is concave is a bit strange; it is a consequence of the fact that for positive definite  $V$ , and vectors  $x$ , the expression  $x^T M^{-1} x$  is convex as a function of *both* arguments, implying it is convex even when both arguments are affine functions of the optimization variables.)  $\square$

## C Proof of Theorem 1: A Sample-Efficient Algorithm for Near-Optimal Semilinear Estimators

While Algorithm 1 takes as input the entire description  $(A_1, B_1), \dots, (A_m, B_m)$  of the joint sample/target distribution, such a description might be (1) unavailable in practice and/or (2) have support  $m$  that is exponentially large. To address both cases, in this section we design an algorithm that achieves essentially the performance guarantees of Algorithm 1 (as given by Theorem 3), though relying only on *sampling* access to  $P$ . Algorithm 2 will run in time polynomial in  $n$  and *independent* of the (possibly exponential) distribution description length  $m$ .

---

### Algorithm 2 Sampling algorithm to approximate the best semilinear estimator

---

**Input:** Accuracy parameter  $\epsilon > 0$ ;  $t$  random samples from the joint distribution of sample and target sets,  $(A_{s_1}, b_{s_1}), \dots, (A_{s_t}, b_{s_t})$ , where each  $A_i \subset \{1, \dots, n\}$  is the set of sample set indices in the  $i^{\text{th}}$  case and each  $b_i$  is a vector with uniform values over the target set in the  $i^{\text{th}}$  case as in Definition 4; and the actual instance to predict, specified by  $(A, b)$  and the values  $x_A$ .

For an  $n \times n$  matrix  $V$  and a set  $A_i \in \{1, \dots, n\}$ , let  $V_{A_i}$  denote  $V$  restricted to the rows in  $A_i$ , and let  $V_{A_i, A_i}$  denote  $V$  restricted to *both* rows and columns in  $A_i$ .

1. Compute the concave maximization

$$\tilde{V} = \arg \max_{V \succeq \epsilon, V_{j,j} \leq 1} \sum_{i=1}^t b_{s_i}^T (V - V_{(A_{s_i})}^T V_{(A_{s_i}, A_{s_i})}^{-1} V_{(A_{s_i})}) b_{s_i} \quad (10)$$

2. Output the estimate  $x_A \tilde{V}_{(A,A)}^{-1} \tilde{V}_{(A)} b$ .
- 

As compared with Algorithm 1, Algorithm 2 restricts the domain of optimization to matrices  $V$  that have eigenvalues at least  $\epsilon$ , instead of at least 0 (which is a convex restriction). Crucially, instead of summing over all  $m$  possible sample/target set possibilities, the optimization is over a small subset of size  $t$ , obtained by sampling. Finally, the output of this algorithm is phrased as a single estimate for the data in question (described to the algorithm via the triple  $A, b, x_A$ , as opposed to Algorithm 1, which returned the entire list of  $m$  semilinear estimator coefficients). The following theorem, characterizing the performance of the above algorithm, immediately implies Theorem 1.

**Theorem 4.** *The mean squared error of the estimate output by Algorithm 2, over the randomness of the queried sample and target sets  $(A, b)$ , is within a multiplicative  $\frac{\pi}{2}$  factor and an additive  $6\epsilon$  factor of the performance of the optimum semilinear estimator, with probability  $1 - e^{-t \cdot \epsilon^5 / \text{poly}(n)}$  over the sampled inputs  $(A_{s_1}, b_{s_1}), \dots, (A_{s_t}, b_{s_t})$ . The probability of failure can thus be made exponentially small in  $n$  by using  $t = \text{poly}(n) / \epsilon^5$  samples, for a sufficiently large polynomial in  $n$ .*

We first prove three structural lemmas that characterize the optimization objective, and then put the pieces together making use of concentration bounds, applied over an  $\epsilon$ -net of matrices in the domain of the optimization.

**Lemma 1.** *For any valid  $V$ , the  $i^{\text{th}}$  term in the sum of Equation 3—or equivalently Equation 9 or Equation 10—is between 0 and 1.*

*Proof.* From the derivation of Equation 3 in the proof of Theorem 3, the inner summation is equal to the inner minimization in Equation 9, which we analyze instead. Since the quadratic form specified by  $V$  in Equation 9 is positive semidefinite, it thus always evaluates to a nonnegative number proving the first part of the claim.

Consider the inner minimum when all coefficients  $a_i$  are identically 0. Since each  $b_i$  is a nonnegative vector of sum 1, and thus since all entries of  $V$  have magnitude at most 1 (because of the diagonal constraint, and the positive semidefinite constraint), we have  $\sum_{j,k=1}^n b_{i(j)} b_{i(k)} V_{j,k} \leq 1$ , as desired.  $\square$

**Lemma 2.** *The optimum objective value of the max in Equation 3 decreases by at most  $\epsilon m$  if the domain of the maximization is further restricted so that  $V$ , instead of being positive semidefinite, must now have all eigenvalues at least  $\epsilon$ .*

*Proof.* From the derivation of Equation 3 in the proof of Theorem 3, the inner summation is equal to the inner minimization in Equation 9, which we analyze instead.

Letting  $V$  be the optimal matrix in Equation 9 we instead consider the matrix  $V_\epsilon = \epsilon I_n + (1 - \epsilon)V$  where  $I_n$  is the  $n \times n$  identity matrix. Since the objective is linear in  $V$ , when evaluated at  $V_\epsilon$  it will have value  $\epsilon$  times the objective value for  $I_n$ —which is nonnegative by Lemma 1—plus  $(1 - \epsilon)$  times its optimal objective value at  $V$ —which is at most 1 by Lemma 1. Thus  $V_\epsilon$  has objective value within  $\epsilon$  of the optimum, as desired.  $\square$

**Lemma 3.** *For a fixed symmetric matrix  $V$  whose eigenvalues are all at least  $\epsilon$ , the expression inside the sum of Equation 3, for any  $i$ , varies with respect to changing a coordinate of  $V$  by at most  $\left| \frac{d}{dV_{j,k}} b_i^T (V - V_{(A_i)}^T V_{(A_i,A_i)}^{-1} V_{(A_i)}) b_i \right| \leq \frac{1}{\epsilon^2} \text{poly}(n)$ .*

*Proof.* Since  $V$  has eigenvalues at least  $\epsilon$ , so does any (principal) submatrix  $V_{(A_i,A_i)}$ . Thus the inverse  $V_{(A_i,A_i)}^{-1}$  has eigenvalues at most  $\frac{1}{\epsilon}$ , and thus the  $L_2$  norm of any column of  $V_{(A_i,A_i)}^{-1}$  is at most  $\frac{1}{\epsilon}$ . Since  $\frac{d}{dV_{j,k}} V_{(A_i,A_i)}^{-1}$  equals negative the inner product of the columns (or rows)  $j$  and  $k$  of  $V_{(A_i,A_i)}^{-1}$ , this derivative is thus at most  $\frac{1}{\epsilon^2}$ . Applying the product rule can increase this by only a  $\text{poly}(n)$  factor.  $\square$

We assemble these pieces to prove the performance of Algorithm 2.

*Proof of Theorem 4.* For any fixed  $V$  in Equation 3, the average of the  $m$  terms in the sum may be estimated as the empirical average of the  $t$  terms we can compute from our randomly sampled inputs  $(A_{s_1}, b_{s_1}), \dots, (A_{s_t}, b_{s_t})$ . Since, by Lemma 1, each term is between 0 and 1, the standard Chernoff/Hoeffding bounds imply that the empirical mean of  $t$  random terms will be within  $\epsilon$  of the true mean except with probability  $e^{-2\epsilon^2 t}$ .

Let  $\epsilon' = \epsilon^3 / \text{poly}(n)$  be a radius such that, by Lemma 3, any two matrices satisfying the constraints of the arg max of Equation 10 that are within distance  $\epsilon'$  of each other must yield values for each term in the sum, that are within  $\epsilon$  of each other. Consider applying the concentration bounds of the previous paragraph to each  $V$  in an  $\epsilon'$ -net of matrices satisfying the conditions of Equation 10—namely, positive definite with eigenvalues at least  $\epsilon$ , and all diagonal entries at most 1. Recall that an  $\epsilon'$ -net will have each matrix within distance  $\epsilon'$  of one of the matrices in the net, and that the net will consist of  $e^{\text{poly}(n)/\epsilon'}$  matrices. As we consider bounds up to  $\text{poly}(n)$  factors, the choice of norm for the matrices does not matter, but for concreteness, consider the  $\epsilon'$ -net to be defined in the Frobenius norm. By the union bound, the Chernoff/Hoeffding bound of the previous paragraph applies for every  $V$  in the  $\epsilon'$ -net except with probability  $e^{-2\epsilon^2 t + \text{poly}(n)/\epsilon'}$ , which is thus negligible when the number of samples is  $t = \text{poly}(n)/\epsilon'\epsilon^2 = \text{poly}(n)/\epsilon^5$ .

We thus show that the performance of the estimator described by the sampled  $\tilde{V}$  is close to the performance of the optimal semilinear estimator  $\hat{V}$  with eigenvalues at least  $\epsilon$ . Let  $\tilde{V}', \hat{V}'$  respectively represent the nearest elements of the  $\epsilon'$ -net to  $\tilde{V}, \hat{V}$  respectively. For ease of notation, we let  $\hat{f}(V)$  and  $\tilde{f}(V)$  respectively describe the functions of  $V$  described by the average term in the sums of Equations 3 and 10 respectively. Thus we have

$$\hat{f}(\tilde{V}) \geq \hat{f}(\tilde{V}') - \epsilon \geq \tilde{f}(\tilde{V}') - 2\epsilon \geq \tilde{f}(\tilde{V}) - 3\epsilon \geq \tilde{f}(\hat{V}') - 3\epsilon \geq \hat{f}(\hat{V}') - 4\epsilon \geq \hat{f}(\hat{V}) - 5\epsilon,$$

where the inequalities hold respectively because of (1) the  $\epsilon'$ -nearness of  $\tilde{V}, \tilde{V}'$  combined with the derivative guarantee of Lemma 3 as applied to  $\hat{f}$ ; (2) the Chernoff/Hoeffding bound at the point  $\tilde{V}'$  of the  $\epsilon'$ -net; (3) the  $\epsilon'$ -nearness of  $\tilde{V}, \tilde{V}'$  combined with the derivative guarantee of Lemma 3 as applied to  $\tilde{f}$ ; (4) the fact that  $\tilde{V}$  attains the maximum of  $\tilde{f}$ ; (5) the Chernoff/Hoeffding bound at the point  $\tilde{V}'$  of the  $\epsilon'$ -net; and (6) the  $\epsilon'$ -nearness of  $\hat{V}, \hat{V}'$  combined with the derivative guarantee of Lemma 3 as applied to  $\hat{f}$ .

Thus, the algorithm described by  $\tilde{V}$  has true performance within  $5\epsilon$  of the optimal under the eigenvalue constraint, achieved by  $\hat{V}$ . By Lemma 2,  $\hat{V}$  itself is within  $\epsilon$  of the true optimal performance of Equation 3, which in turn is within a factor of  $\frac{\pi}{2}$  of that of the best semilinear estimator, as desired.  $\square$

## D Suboptimality of Semilinear Schemes (Fact 1)

Via a computer-aided brute-force search over small examples, we found a distribution,  $P$ , for which the best semilinear algorithm had larger worst-case expected error than the best arbitrary scheme:

**Example 4.** Let  $n = 4$ . Consider the distribution over sampling from the population  $\{1, 2, 3, 4\}$  that assigns a 0.3 probability to the following pairs of sample/target sets  $(\{1, 3\}, \{2, 4\})$ ,  $(\{2, 4\}, \{1, 3\})$ ,  $(\{3, 4\}, \{1, 2\})$  and a 0.05 probability to  $(\{1, 3, 4\}, \{2\})$  and  $(\{2, 3, 4\}, \{1\})$ . The optimal semilinear scheme achieves worst-case expected squared error 0.6652, compared to 0.6627 for the optimal unconstrained scheme. Hence even for sample/target set distributions over  $n = 4$  datapoints, semilinear schemes are not always worst-case optimal.

## E Proof of Theorem 2: Linear Regression Setting

We prove Theorem 2 here, which for clarity we restate and reintroduce slightly more formally.

We consider the following natural extension of our results to the setting of  $d$ -dimensional linear regression. Our regression results follow from a transparent application of the main results, Theorem 1 or Theorem 3, demonstrating the flexibility and scope of our approach. We emphasize that many variants of this model are interesting, and that a more specialized analysis may yield stronger bounds than what we show here.

**Definition 9.** Given a sample set  $A$  and a target set  $B$ , where for each  $i \in A$  we are given a pair  $(x_i, y_i)$  with the independent variable  $x_i \in [-1, 1]^d$  and the dependent variable  $y_i \in [-1, 1]$ , the goal is to recover a coefficient vector  $\beta$  that minimizes the mean squared error on the target set,  $\mathbb{E}_{i \sim B}[(x_i^\top \beta - y_i)^2]$ , when additionally given access to the joint distribution  $P$  from which  $(A, B)$  are drawn. The least-squares coefficients are defined, as is standard, as  $\beta = (E_{i \sim B}[x_i x_i^\top])^{-1} E_{i \sim B}[x_i y_i]$ . As we do not have access to the target set data  $(x_i, y_i)$  for  $i \in B$ , we instead must estimate it: depending on whether distribution  $P$  is given explicitly, or via sample access, use Theorems 1 or 3 respectively to estimate (in terms of  $P$  and the sample data  $(x_i, y_i)$  for  $i \in A$ ) each of the  $d^2$  entries in the matrix  $Q = E_{i \in B}[x_i x_i^\top]$  and the  $d$  entries in the vector  $u = E_{i \in B}[x_i y_i]$ , all of which are in  $[-1, 1]$ . Our estimated coefficients are then  $\hat{\beta} = \hat{Q}^{-1} \hat{u}$ .

**Theorem.** Given a regression problem as in Definition 9, where the distribution  $P$  is specified either via sampling access or explicitly, and let  $\alpha_P$  be the mean squared error guaranteed by Theorem 1 or 3 respectively, for estimating the mean of a scalar (which depends only on  $P$ ). Then, letting  $\sigma_d$  be the smallest singular value of the (uncentered covariance) matrix  $Q$ , for any  $\delta > 0$ , the algorithm of Definition 9 will return an estimate  $\hat{\beta}$  of the least-squares regression coefficients  $\beta$  such that with probability at least  $1 - \delta$  we have  $\|\beta - \hat{\beta}\| \leq 3 \frac{\sqrt{\alpha_P d^3 / \delta}}{\sigma_d^2}$ , provided this expression is at most 0.08; in the case that the independent variables  $x_i$  are known for the target set (and only the  $y_i$ 's are unknown) then except with  $\delta$  probability, we have  $\|\beta - \hat{\beta}\| \leq \frac{\sqrt{\alpha_P d / \delta}}{\sigma_d}$ .

*Proof.* Recall we are in the following regression setting: data consists of pairs  $(x_i, y_i)$  where  $x_i \in [-1, 1]^d$  and  $y_i \in [-1, 1]$ ; indices  $i \in [n]$  are drawn for the input sample  $A$  and target set  $B$  from a joint distribution,  $(A, B) \sim P$ . The goal, given the training data and a description of  $P$  (or sample access to  $P$ ), is to compute linear coefficients  $\beta \in \mathbb{R}^d$ , such that the mean squared error over target indices  $i \in B$  is as small as possible, namely, to minimize  $\mathbb{E}_{i \sim B}[(x_i^\top \beta - y_i)^2]$ . Our results will be parameterized in terms of  $\alpha_P$ , the mean squared estimation accuracy that Theorem 1 or Theorem 3 affords us on distribution  $P$  (in the scalar mean estimation setting).

As is standard in least squares regression, note that the expression we are minimizing,  $\mathbb{E}_{i \sim B}[(x_i^\top \beta - y_i)^2]$ , is positive semidefinite as a function of  $\beta$ , and thus is minimized when its gradient with respect to  $\beta$  equals 0. Hence we solve  $\mathbb{E}_{i \sim B}[x_i(x_i^\top \beta - y_i)] = 0$ , or equivalently,  $\mathbb{E}_{i \sim B}[x_i x_i^\top] \beta = \mathbb{E}_{i \sim B}[x_i y_i]$ , which has solution  $\beta = (E_{i \sim B}[x_i x_i^\top])^{-1} E_{i \sim B}[x_i y_i]$ . Now, for any  $i$ , each of the  $d^2$

entries of the matrix  $x_i x_i^\top$  is in  $[-1, 1]$ , and thus its average value over  $i$  in the target set  $B$  can be estimated to within mean squared error  $\alpha_P$  based on its values for  $i$  in the sample set  $A$ , from Theorem 1 or 3; the same holds for each of the  $d$  entries in the vector  $x_i y_i$ .

Let  $Q = \mathbb{E}_{i \sim B}[x_i x_i^\top]$ , and let  $Q + F$  (referred to as  $\hat{Q}$  in definition 9) be the random variable representing the estimate of  $Q$  given by Theorem 1 or 3, where the square of each entry of  $F$  has expectation at most  $\alpha_P$ ; hence by Markov's inequality, for any  $\delta > 0$ , with probability at least  $1 - \delta$  the matrix  $F$  has Frobenius norm at most  $\sqrt{\alpha_P d^2 / \delta}$ . Correspondingly, let  $u = \mathbb{E}_{i \sim B}[x_i y_i]$ , and let  $u + g$  be the random variable representing the estimate of  $u$  returned by our algorithm, where, except with probability  $\delta$ , the vector  $g$  has length at most  $\sqrt{\alpha_P d / \delta}$ . Taking the union bound, we have that except with probability  $2\delta$ , the bounds on both  $F$  and  $g$  hold, and we analyze this case below.

As described above, the optimal linear coefficients are given by  $\beta = Q^{-1}u$ , and meanwhile our estimate is  $\hat{\beta} = (Q + F)^{-1}(u + g)$ . We bound the discrepancy  $\|\beta - \hat{\beta}\|$  via the triangle inequality, first bounding the change induced by adding  $g$ , and then bounding the change from adding  $F$ :

$$\|\beta - \hat{\beta}\| = \|Q^{-1}u - (Q + F)^{-1}(u + g)\| \leq \|Q^{-1}u - Q^{-1}(u + g)\| + \|Q^{-1}(u + g) - (Q + F)^{-1}(u + g)\|$$

The first term on the right hand side equals  $\|Q^{-1}g\|$ , which we bound as the product of the length of  $g$  and the largest singular value of  $Q^{-1}$ , which is the inverse of the smallest singular value of  $Q$ , which we have denoted  $\sigma_d$ . Thus we have  $\|Q^{-1}g\| \leq \frac{1}{\sigma_d} \sqrt{\alpha_P d / \delta}$ .

Bounding the second term is slightly more involved. The goal is to bound  $\|[Q^{-1} - (Q + F)^{-1}](u + g)\|$ . We first bound the largest singular value of the matrix  $Q^{-1} - (Q + F)^{-1}$ . For any  $\lambda \in [0, 1]$ , consider interpolating between  $Q$  and  $Q + F$  to get  $Q + \lambda F$ . Let  $s_\lambda$  be the smallest singular value of this matrix, and let  $v_\lambda$  be the corresponding singular vector, with  $\|v_\lambda\| = 1$ . Since  $Q$  has smallest singular value  $\sigma_d$ , we have  $\|Qv_\lambda\| \geq \sigma_d$ ; since  $F$  has Frobenius norm at most  $\sqrt{\alpha_P d^2 / \delta}$  and the Frobenius norm bounds the largest singular value, we have  $\|Fv_\lambda\| \leq \sqrt{\alpha_P d^2 / \delta}$ , and by the triangle inequality, the difference of these two expressions is a lower bound on  $s$ :  $s = \|(Q + F)v_\lambda\| \geq \sigma_d - \sqrt{\alpha_P d^2 / \delta}$ .

Consider the matrix  $(Q + \lambda F)^{-1}$  as we linearly move  $\lambda$  from 0 to 1. The derivative with respect to  $\lambda$  of this matrix inverse is  $-(Q^{-1} + \lambda F)F(Q + \lambda F)^{-1}$ , which thus has largest singular value at most the product of our bounds on the singular values for the 3 terms:

$$\frac{\sqrt{\alpha_P d^2 / \delta}}{(\sigma_d - \sqrt{\alpha_P d^2 / \delta})^2} \quad (11)$$

Since  $\|u + g\| \leq \sqrt{d} + \sqrt{\alpha_P d / \delta}$  from summing bounds on  $\|u\|$  and  $\|g\|$ , we multiply this by Equation 11—bounding the amount the matrix  $(Q + \lambda F)^{-1}$  changes as we interpolate from  $Q$  to  $Q + F$ —to get our total bound for the second triangle inequality term. Adding this to the bound on the first term, we have

$$\|\beta - \hat{\beta}\| = \|(Q + F)^{-1}(u + g) - Q^{-1}u\| \leq \frac{1}{\sigma_d} \sqrt{\alpha_P d / \delta} + (\sqrt{d} + \sqrt{\alpha_P d / \delta}) \frac{\sqrt{\alpha_P d^2 / \delta}}{(\sigma_d - \sqrt{\alpha_P d^2 / \delta})^2} \quad (12)$$

To simplify this bound, consider the case that  $\frac{\sqrt{\alpha_P d^3 / \delta}}{\sigma_d^2} \leq c$ .

Since matrix  $Q$  has entries in  $[-1, 1]$ , its singular values are at most  $\sqrt{d}$ , and thus  $\frac{\sqrt{d}}{\sigma_d} \geq 1$ , yielding  $\frac{\sqrt{\alpha_P d^2 / \delta}}{\sigma_d} \leq c$ , and implying that if we replace the denominator  $(\sigma_d - \sqrt{\alpha_P d^2 / \delta})^2$  in Equation 12 by simply  $\sigma_d^2$  then the expression will decrease by at most a factor of  $(1 - c)^2$ . Similarly, in Equation 12 the parenthetical term  $(\sqrt{d} + \sqrt{\alpha_P d / \delta})$  has second part bounded by  $\sqrt{\alpha_P d / \delta} \leq c \frac{\sigma_d}{\sqrt{d}} \leq c$  and thus replacing  $(\sqrt{d} + \sqrt{\alpha_P d / \delta})$  by simply  $\sqrt{d}$  will decrease the term by at most a factor of  $\frac{1}{1+c}$ . Thus the right hand side of Equation 12 is the sum of two terms,  $\frac{\sqrt{\alpha_P d / \delta}}{\sigma_d}$ , and a term  $\frac{\sqrt{\alpha_P d^3 / \delta}}{\sigma_d^2}$  times a factor between 1 and  $\frac{1+c}{(1-c)^2}$ ; the first term is clearly at most the second term since  $\sigma_d \leq \sqrt{d} \leq d^2$ , so thus we have  $\|\beta - \hat{\beta}\| \leq (1 + \frac{1+c}{(1-c)^2}) \frac{\sqrt{\alpha_P d^3 / \delta}}{\sigma_d^2}$ . Substituting  $2\delta \rightarrow \delta$  so that the overall probability

of failure becomes  $\delta$ , the proportionality constant becomes  $\sqrt{2}(1 + \frac{1+c}{(1-c)^2})$ , which for  $c \leq 0.0378$  yields a constant of 3, as desired. Thus, in the context of the theorem, substituting in  $\frac{1}{2}\delta$  for  $\delta$ , when  $3 \frac{\sqrt{\alpha_P d^3 / (\delta/2)}}{\sigma_d^2} \leq 0.08$ , we will have  $c \leq \frac{0.08\sqrt{2}}{3} < 0.0378$  as desired.

In the simpler case where the independent variables  $x_i$  are known, and hence  $Q$  does not need to be estimated, our probability of failure is  $\delta$  instead of  $2\delta$ , and only the first term from Equation 12 appears, immediately yielding the other part of the theorem.

□
